# Supplementary material for: Which Diversity Matters? Contextualizing the Impact of Cultural Diversity and Inequality on Entrepreneurial Intentions
Source: publisher site journal article supplement (doi:10.1515/erj-2025-0196), 2025-10-01
Supplement: Supplementary file 1 [file j_erj-2025-0196_suppl_001.docx]

**Supplementary material**

Table 1S. Linear probability model of entrepreneurial intentions on cultural diversity.

|  | Model 1 | Model 2 | Model 3 |
| --- | --- | --- | --- |
| VARIABLES | B | B | B |
|  |  |  |  |
| Ethnic diversity | -0.25*** | -0.59*** | -0.60*** |
|  | (0.03) | (0.04) | (0.04) |
| Linguistic diversity | 0.01 | -0.00 | 0.13** |
|  | (0.02) | (0.04) | (0.05) |
| Religious diversity | -0.16*** | 0.02 | 0.10* |
|  | (0.03) | (0.04) | (0.04) |
| Ethnic diversity^2 | 0.72*** | 0.80*** | 0.87*** |
|  | (0.04) | (0.05) | (0.06) |
| Linguistic diversity^2 | -0.20*** | 0.01 | -0.20** |
|  | (0.02) | (0.05) | (0.06) |
| Religious diversity^2 | -0.04 | -0.14*** | -0.26*** |
|  | (0.03) | (0.04) | (0.04) |
| Female | -0.05*** | -0.04*** | -0.04*** |
|  | (0.00) | (0.00) | (0.00) |
| Age | -0.00*** | -0.00*** | -0.00*** |
|  | (0.00) | (0.00) | (0.00) |
| Primary educationa | -0.07*** | 0.02 | 0.02* |
|  | (0.01) | (0.01) | (0.01) |
| (Lower) secondarya | -0.06*** | 0.02** | 0.02** |
|  | (0.01) | (0.01) | (0.01) |
| (Upper) secondary educationa | -0.04*** | 0.02** | 0.02** |
|  | (0.01) | (0.01) | (0.01) |
| Post-secondary non-tertiary educationa | -0.00 | 0.04*** | 0.04*** |
|  | (0.01) | (0.01) | (0.01) |
| First stage of tertiary educationa | 0.02 | 0.07*** | 0.07*** |
|  | (0.01) | (0.01) | (0.01) |
| Second stage of tertiary educationa | 0.05*** | 0.08*** | 0.07*** |
|  | (0.01) | (0.01) | (0.01) |
| GINI |  | -0.00*** | 0.01*** |
|  |  | (0.00) | (0.00) |
| GDP |  | -0.00 | 0.00 |
|  |  | (0.00) | (0.00) |
| Life expectancy |  | 0.01*** | 0.00 |
|  |  | (0.00) | (0.00) |
| Urban population |  | -0.00*** | -0.00*** |
|  |  | (0.00) | (0.00) |
| Variates of Democracy Index |  | -0.40*** | -0.43*** |
|  |  | (0.02) | (0.02) |
| Financial Freedom |  | 0.00*** | 0.00*** |
|  |  | (0.00) | (0.00) |
| Government Integrity |  | 0.00 | -0.00*** |
|  |  | (0.00) | (0.00) |
| Freedom from Government |  | 0.00*** | 0.00*** |
|  |  | (0.00) | (0.00) |
| Investment Freedom |  | 0.00 | 0.00** |
|  |  | (0.00) | (0.00) |
| Labor Freedom |  | -0.00*** | 0.00*** |
|  |  | (0.00) | (0.00) |
| Monetary Freedom |  | -0.00*** | -0.00*** |
|  |  | (0.00) | (0.00) |
| Property Rights |  | -0.00*** | -0.00 |
|  |  | (0.00) | (0.00) |
| Tax Burden |  | -0.00** | -0.00*** |
|  |  | (0.00) | (0.00) |
| Trade Freedom |  | 0.01*** | 0.00*** |
|  |  | (0.00) | (0.00) |
| Business Freedom |  | 0.01*** | 0.01*** |
|  |  | (0.00) | (0.00) |
| Self-employment rate |  | -0.00*** | -0.00*** |
|  |  | (0.00) | (0.00) |
| Easy of Doing Business Index |  | -0.01*** | -0.01*** |
|  |  | (0.00) | (0.00) |
| Ethnic diversity#GINI |  |  | -0.02*** |
|  |  |  | (0.00) |
| Linguistic diversity#GINI |  |  | 0.02*** |
|  |  |  | (0.00) |
| Religious diversity#GINI |  |  | -0.02*** |
|  |  |  | (0.00) |
| Constant | 0.51*** | 0.37*** | 0.35*** |
|  | (0.01) | (0.01) | (0.01) |
|  |  |  |  |
| Observations | 149,742 | 149,742 | 149,742 |
| R-squared | 0.08 | 0.15 | 0.15 |
| Note: Robust standard errors in parentheses. All the models include region fixed effects. aReference Category: Pre-primary education. *** p<0.001, ** p<0.01, * p<0.05. | | | |

Table 2S. Analyses of influential countries.

|  | Model 1 | Model 2 |
| --- | --- | --- |
| VARIABLES | B | B |
|  |  |  |
| Ethnic diversity | 1.30*** | 1.02 |
|  | (0.12) | (1.66) |
| Linguistic diversity | -0.69*** | -0.78 |
|  | (0.10) | (1.28) |
| Religious diversity | -0.37*** | -0.52 |
|  | (0.07) | (0.90) |
| Female | -0.29*** | -0.31*** |
|  | (0.02) | (0.05) |
| Age | -0.03*** | -0.03*** |
|  | (0.00) | (0.00) |
| Primary educationa | 0.07 | 0.02 |
|  | (0.07) | (0.15) |
| (Lower) secondarya | 0.10 | 0.07 |
|  | (0.06) | (0.14) |
| (Upper) secondary educationa | 0.14* | 0.11 |
|  | (0.06) | (0.14) |
| Post-secondary non-tertiary educationa | 0.24*** | 0.23 |
|  | (0.06) | (0.13) |
| First stage of tertiary educationa | 0.47*** | 0.44** |
|  | (0.06) | (0.14) |
| Second stage of tertiary educationa | 0.47*** | 0.44 |
|  | (0.08) | (0.26) |
| GINI | 0.06*** | 0.01 |
|  | (0.01) | (0.13) |
| GDP | 0.00*** | 0.00 |
|  | (0.00) | (0.00) |
| Life expectancy | 0.02*** | 0.02 |
|  | (0.01) | (0.11) |
| Urban population | -0.03*** | -0.02 |
|  | (0.00) | (0.02) |
| Variates of Democracy Index | -2.20*** | -2.00 |
|  | (0.15) | (2.12) |
| Financial Freedom | 0.01*** | 0.01 |
|  | (0.00) | (0.03) |
| Government Integrity | -0.01 | -0.01 |
|  | (0.00) | (0.04) |
| Freedom from Government | 0.01*** | 0.01 |
|  | (0.00) | (0.02) |
| Investment Freedom | -0.00* | -0.00 |
|  | (0.00) | (0.03) |
| Labor Freedom | -0.00 | -0.00 |
|  | (0.00) | (0.02) |
| Monetary Freedom | -0.00 | -0.00 |
|  | (0.00) | (0.05) |
| Property Rights | 0.01*** | 0.01 |
|  | (0.00) | (0.03) |
| Tax Burden | -0.01*** | -0.01 |
|  | (0.00) | (0.03) |
| Trade Freedom | 0.03*** | 0.04 |
|  | (0.00) | (0.07) |
| Business Freedom | 0.03*** | 0.04 |
|  | (0.00) | (0.03) |
| Self-employment rate | -0.02*** | -0.02 |
|  | (0.00) | (0.03) |
| Easy of Doing Business Index | -0.06*** | -0.07 |
|  | (0.01) | (0.08) |
| Ethnic diversity#GINI | -0.07*** | -0.05 |
|  | (0.02) | (0.28) |
| Linguistic diversity#GINI | 0.13*** | 0.12 |
|  | (0.01) | (0.16) |
| Religious diversity#GINI | -0.16*** | -0.12 |
|  | (0.01) | (0.15) |
| Constant | -1.29*** | -1.02 |
|  | (0.09) | (0.87) |
|  |  |  |
| Observations | 137,783 | 149,742 |
| Note: Robust standard errors in parentheses. All the models include region fixed effects. aReference Category: Pre-primary education. *** p<0.001, ** p<0.01, * p<0.05. | | |

Table 3S. Analytical samples by country and region classification.

| Country | Analytical sample | Region |
| --- | --- | --- |
| Argentina | 1972 | South America |
| Australia | 1814 | Asia Pacific |
| Bosnia and Herzegovina | 1890 | Eastern Europe |
| Brazil | 1969 | South America |
| Bulgaria | 1732 | Eastern Europe |
| Canada | 1913 | North and Central America |
| Chile | 9001 | South America |
| China | 3677 | Asia Pacific |
| Colombia | 1933 | South America |
| Croatia | 1854 | Eastern Europe |
| Cyprus | 1845 | Eastern Europe |
| Ecuador | 2052 | South America |
| Egypt | 2257 | Africa |
| Estonia | 1918 | Eastern Europe |
| France | 1958 | Western Europe |
| Germany | 4252 | Western Europe |
| Greece | 1943 | Eastern Europe |
| Guatemala | 2631 | North and Central America |
| India | 3967 | Western Asia, Central Asia, South Asia |
| Indonesia | 2381 | Asia Pacific |
| Iran | 2908 | Western Asia, Central Asia, South Asia |
| Ireland | 1870 | Western Europe |
| Israel | 1664 | Western Asia, Central Asia, South Asia |
| Italy | 1912 | Western Europe |
| Japan | 1775 | Asia Pacific |
| Kazakhstan | 1373 | Western Asia, Central Asia, South Asia |
| Latvia | 1906 | Eastern Europe |
| Lebanon | 1558 | Western Asia, Central Asia, South Asia |
| Luxembourg | 1692 | Western Europe |
| Madagascar | 1989 | Africa |
| Malaysia | 1924 | Asia Pacific |
| Mexico | 5007 | North and Central America |
| Morocco | 3057 | Africa |
| Netherlands | 2202 | Western Europe |
| Panama | 1952 | North and Central America |
| Peru | 1957 | South America |
| Poland | 4250 | Eastern Europe |
| Slovakia | 1850 | Eastern Europe |
| Slovenia | 1873 | Eastern Europe |
| South Africa | 2994 | Africa |
| South Korea | 1923 | Asia Pacific |
| Spain | 22462 | Western Europe |
| Sweden | 4311 | Western Europe |
| Switzerland | 2304 | Western Europe |
| Thailand | 1965 | Asia Pacific |
| United Arab Emirates | 3768 | Western Asia, Central Asia, South Asia |
| United Kingdom | 8447 | Western Europe |
| United States | 1891 | North and Central America |
| Uruguay | 1974 | South America |
| Vietnam | 2025 | Asia Pacific |
